# Supplementary material for: Joint Modeling of Genetics and Field Variation in Plant Breeding Trials Using Relationship and Different Spatial Methods: A Simulation Study of Accuracy and Bias
Source: MDPI journal article supplement (doi:10.3390/agronomy11071397), 2021-07-12
Supplement: s1 [file s1]

Archive with 1 entries (1 files):
- agronomy-1249904-supplementary.pdf
